# Supplementary material for: Preventive Behavioral Insights for Emerging Adults: A Survey during the COVID-19 Pandemic
Source: MDPI journal article supplement (doi:10.3390/ijerph18052569), 2021-03-04
Supplement: s1 [file s1]

Table S1. Sex difference in preventive behaviors related to COVID-19.

| ITEM                        |                                                                                              | Not at all | rarely | Some times | Frequently | All the time |
|-----------------------------|----------------------------------------------------------------------------------------------|------------|--------|------------|------------|--------------|
| Hand hygiene                |                                                                                              |            |        |            |            |              |
| 1                           | I wash my hands immediately upon returning home                                              |            |        |            |            |              |
| 2                           | I wash my hands for at least 30 seconds with soap and water                                  |            |        |            |            |              |
| Mobile phone hygiene        |                                                                                              |            |        |            |            |              |
| 3                           | I disinfect my phone or other objects before using for sanitation                            |            |        |            |            |              |
| Mask                        |                                                                                              |            |        |            |            |              |
| 4                           | I always wear a face mask when going outside                                                 |            |        |            |            |              |
| 5                           | When I wear a mask, I keep my nose and mouth covered at all times                            |            |        |            |            |              |
| 6                           | I do not touch the outside of my mask                                                        |            |        |            |            |              |
| Coughing                    |                                                                                              |            |        |            |            |              |
| 7                           | When I sneeze or cough, I do not use my hand to cover my mouth but use a tissue or my sleeve |            |        |            |            |              |
| Social distancing behaviors |                                                                                              |            |        |            |            |              |
| 8                           | I have postponed or cancelled gatherings to prevent COVID-19 infection                       |            |        |            |            |              |
| Infodemic                   |                                                                                              |            |        |            |            |              |
| 9                           | I have made unverified COVID-19 related materials or videos                                  |            |        |            |            |              |
| 10                          | I have shared unverified COVID-19 related materials or videos to my friends or on SNS        |            |        |            |            |              |
| Perceived susceptibility    |                                                                                              |            |        |            |            |              |
| 1                           | The COVID-19 pandemic is an issue that is highly relatable to me                             |            |        |            |            |              |
| 2                           | I am more susceptible to COVID-19 infection                                                  |            |        |            |            |              |
| Perceived severity          |                                                                                              |            |        |            |            |              |
| 3                           | Being infected with COVID-19 will affect my studies                                          |            |        |            |            |              |
| 4                           | Being infected with COVID-19 will affect my daily life                                       |            |        |            |            |              |
| 5                           | Being infected with COVID-19 will affect my family negatively                                |            |        |            |            |              |
| Issue involvement           |                                                                                              |            |        |            |            |              |
| 6                           | I consider the COVID-19 pandemic as an important issue                                       |            |        |            |            |              |
| 7                           | The COVID-19 pandemic is an issue that draws attention                                       |            |        |            |            |              |
| 8                           | The COVID-19 pandemic is an issue that is highly relatable to me                             |            |        |            |            |              |
| Subjective Norms            |                                                                                              |            |        |            |            |              |
| 9                           | 11. My friends encourage me to follow the COVID-19 prevention guidelines                     |            |        |            |            |              |
| 10                          | 12. My parents encourage me to follow the COVID-19 prevention guidelines                     |            |        |            |            |              |
| 11                          | My school and teachers encourage me to follow the COVID-19 prevention guidelines             |            |        |            |            |              |
| 12                          | YouTube and SNS encourage me to follow the COVID-19 prevention guidelines                    |            |        |            |            |              |
| 13                          | The news, both print and online, encourage me to follow the COVID-19 prevention guidelines   |            |        |            |            |              |

|    |                                                                   |  |  |  |  |  |
|----|-------------------------------------------------------------------|--|--|--|--|--|
| 14 | I tend to follow my friends' advice                               |  |  |  |  |  |
| 15 | I tend to follow my parents' advice                               |  |  |  |  |  |
| 16 | I tend to follow advice given by my school and teachers           |  |  |  |  |  |
| 17 | I tend to follow advice given by YouTube and SNS                  |  |  |  |  |  |
| 18 | I tend to follow advice given by the news, both print and offline |  |  |  |  |  |
